# Supplementary material for: Chronic pain among U.S. sexual minority adults who identify as gay, lesbian, bisexual, or “something else”
Source: PubMed Central journal article supplement — Pain. 2023 Mar 30;164(9):1942–53. doi: 10.1097/j.pain.0000000000002891 (PMC10436360; doi:10.1097/j.pain.0000000000002891), 2023-03-30
Supplement: jop-164-1942-s001.pdf [file jop-164-1942-s001.pdf]

Supplemental Table S1. Pain prevalence ratios for sexual minority adults, different covariate sets.

|                                           | Pain in 3+ sites |             |         |             | Chronic pain |             |         |             |
|-------------------------------------------|------------------|-------------|---------|-------------|--------------|-------------|---------|-------------|
|                                           | Model 1          |             | Model 2 |             | Model 1      |             | Model 2 |             |
| <b>Sexual identity (straight)</b>         |                  |             |         |             |              |             |         |             |
| Gay/lesbian                               | 1.47***          | [1.32,1.64] | 1.23*** | [1.11,1.36] | 1.33***      | [1.19,1.49] | 1.17**  | [1.06,1.30] |
| Bisexual                                  | 2.05***          | [1.80,2.34] | 1.23*** | [1.09,1.39] | 1.88***      | [1.66,2.14] | 1.25*** | [1.11,1.41] |
| “Something else”                          | 2.33***          | [1.88,2.88] | 1.42*** | [1.17,1.73] | 1.89***      | [1.58,2.26] | 1.31**  | [1.10,1.54] |
| <b>Covariates</b>                         |                  |             |         |             |              |             |         |             |
| Age <sup>1</sup>                          | 1.21***          | [1.19,1.23] | 1.10*** | [1.08,1.12] | 1.38***      | [1.36,1.40] | 1.25*** | [1.23,1.28] |
| Age squared <sup>1</sup>                  | 0.93***          | [0.91,0.94] | 0.92*** | [0.91,0.93] | 0.95***      | [0.94,0.96] | 0.94*** | [0.93,0.95] |
| Female (male)                             | 1.58***          | [1.52,1.65] | 1.40*** | [1.35,1.46] | 1.19***      | [1.15,1.23] | 1.07*** | [1.03,1.10] |
| Year of interview                         | 1.01             | [1.00,1.02] | 1.01**  | [1.00,1.03] | 1.01         | [1.00,1.02] | 1.02*** | [1.01,1.03] |
| <b>Race/ethnicity (NH white)</b>          |                  |             |         |             |              |             |         |             |
| NH Black                                  |                  |             | 0.74*** | [0.69,0.78] |              |             | 0.75*** | [0.71,0.80] |
| Hispanic                                  |                  |             | 0.89*** | [0.83,0.95] |              |             | 0.81*** | [0.75,0.86] |
| NH Asian                                  |                  |             | 0.63*** | [0.55,0.73] |              |             | 0.60*** | [0.53,0.68] |
| NH AIAN                                   |                  |             | 0.84    | [0.69,1.02] |              |             | 0.90    | [0.78,1.04] |
| Multiracial                               |                  |             | 1.11*   | [1.00,1.22] |              |             | 0.92    | [0.83,1.02] |
| DK                                        |                  |             | 1.21    | [0.84,1.76] |              |             | 0.66    | [0.42,1.01] |
| <b>Region (Northeast)</b>                 |                  |             |         |             |              |             |         |             |
| Midwest                                   |                  |             | 1.01    | [0.95,1.07] |              |             | 1.05    | [0.98,1.12] |
| South                                     |                  |             | 1.02    | [0.97,1.08] |              |             | 1.06*   | [1.00,1.13] |
| West                                      |                  |             | 1.16*** | [1.09,1.23] |              |             | 1.17*** | [1.10,1.25] |
| <b>Immigrant status (US-born)</b>         |                  |             |         |             |              |             |         |             |
| In US 15+ years                           |                  |             | 1.00    | [1.00,1.00] |              |             | 1.00    | [1.00,1.00] |
| In US 0-14 years                          |                  |             | 0.81*** | [0.75,0.87] |              |             | 0.80*** | [0.74,0.86] |
| DK                                        |                  |             | 0.60*** | [0.53,0.68] |              |             | 0.57*** | [0.49,0.65] |
| <b>Interview not in English (English)</b> |                  |             |         |             |              |             |         |             |
| DK                                        |                  |             | 0.59    | [0.34,1.05] |              |             | 0.52*   | [0.28,0.96] |
| <b>Marital status (Married)</b>           |                  |             |         |             |              |             |         |             |
| Previously married                        |                  |             | 0.96    | [0.92,1.01] |              |             | 0.99    | [0.95,1.03] |
| Never married                             |                  |             | 0.89*** | [0.84,0.94] |              |             | 0.88*** | [0.84,0.92] |
| DK                                        |                  |             | 0.94    | [0.62,1.40] |              |             | 0.85    | [0.59,1.22] |
| <b>Children at home (No children)</b>     |                  |             |         |             |              |             |         |             |
| One child                                 |                  |             | 1.00    | [0.95,1.05] |              |             | 1.02    | [0.98,1.06] |
| Two or more children                      |                  |             | 0.93**  | [0.88,0.98] |              |             | 1.00    | [0.95,1.05] |
| <b>Education (BA)</b>                     |                  |             |         |             |              |             |         |             |
| Less than HS or GED                       |                  |             | 1.18*** | [1.08,1.28] |              |             | 1.33*** | [1.22,1.45] |
| HS degree                                 |                  |             | 1.06    | [0.98,1.15] |              |             | 1.23*** | [1.14,1.33] |
| Some college                              |                  |             | 1.16*** | [1.07,1.25] |              |             | 1.32*** | [1.22,1.42] |
| AA degree                                 |                  |             | 1.22*** | [1.13,1.32] |              |             | 1.36*** | [1.26,1.47] |
| MA+                                       |                  |             | 0.97    | [0.89,1.05] |              |             | 1.05    | [0.97,1.13] |
| DK                                        |                  |             | 0.96    | [0.67,1.37] |              |             | 1.11    | [0.79,1.55] |
| <b>Family income (\$100,000+)</b>         |                  |             |         |             |              |             |         |             |
| \$0-34,999                                |                  |             | 1.32*** | [1.24,1.42] |              |             | 1.18*** | [1.11,1.26] |
| \$35,000-74,999                           |                  |             | 1.17*** | [1.10,1.25] |              |             | 1.15*** | [1.09,1.22] |
| \$75,000-99,999                           |                  |             | 1.07    | [0.99,1.16] |              |             | 1.04    | [0.97,1.12] |
| DK                                        |                  |             | 1.02    | [0.92,1.13] |              |             | 0.97    | [0.90,1.06] |
| <b>Homeownership (Owns home)</b>          |                  |             |         |             |              |             |         |             |
| Rents                                     |                  |             | 1.02    | [0.98,1.07] |              |             | 1.05*   | [1.01,1.09] |
| Other                                     |                  |             | 1.00    | [0.91,1.09] |              |             | 0.95    | [0.87,1.04] |
| <b>Employment status (Employed)</b>       |                  |             |         |             |              |             |         |             |
| Not employed                              |                  |             | 1.35*** | [1.29,1.41] |              |             | 1.40*** | [1.35,1.46] |
| DK                                        |                  |             | 0.99    | [0.28,3.50] |              |             | 1.10    | [0.42,2.87] |
| <b>Smoking (Never)</b>                    |                  |             |         |             |              |             |         |             |

|                                           |         |             |         |             |
|-------------------------------------------|---------|-------------|---------|-------------|
| Former                                    | 1.24*** | [1.18,1.30] | 1.26*** | [1.21,1.32] |
| Current                                   | 1.25*** | [1.19,1.32] | 1.35*** | [1.30,1.42] |
| DK                                        | 1.17    | [0.72,1.90] | 0.70    | [0.42,1.19] |
| Alcohol use (None)                        |         |             |         |             |
| Former use                                | 1.24*** | [1.16,1.32] | 1.16*** | [1.09,1.23] |
| Moderate use                              | 1.17*** | [1.10,1.24] | 1.04    | [0.99,1.10] |
| Excessive use                             | 1.17*** | [1.10,1.25] | 1.06*   | [1.00,1.13] |
| DK                                        | 1.16    | [0.93,1.44] | 0.91    | [0.76,1.10] |
| BMI (Normal weight, 18.5-24.9)            |         |             |         |             |
| <18.5                                     | 1.06    | [0.93,1.21] | 1.19**  | [1.05,1.36] |
| 25-24.9                                   | 1.07*   | [1.01,1.12] | 1.12*** | [1.07,1.17] |
| 30-34.9                                   | 1.17*** | [1.11,1.23] | 1.33*** | [1.27,1.40] |
| 35-39.9                                   | 1.26*** | [1.18,1.35] | 1.44*** | [1.35,1.53] |
| >=40                                      | 1.27*** | [1.19,1.36] | 1.63*** | [1.54,1.73] |
| DK                                        | 1.04    | [0.93,1.16] | 1.17**  | [1.06,1.29] |
| Physical activity (Adequate)              |         |             |         |             |
| Low, inadequate activity                  | 1.15*** | [1.11,1.20] | 1.24*** | [1.20,1.29] |
| DK                                        | 1.28*** | [1.19,1.37] | 1.43*** | [1.34,1.52] |
| Sleep duration (Normal, 7-8 hrs)          |         |             |         |             |
| Short (<7 hrs)                            | 1.52*** | [1.46,1.58] | 1.46*** | [1.40,1.51] |
| Long (>8 hrs)                             | 1.20*** | [1.11,1.29] | 1.22*** | [1.15,1.30] |
| DK                                        | 1.30*   | [1.06,1.60] | 1.39*** | [1.15,1.70] |
| Psychological distress (Low)              |         |             |         |             |
| Moderate                                  | 2.46*** | [2.36,2.56] | 1.86*** | [1.79,1.93] |
| Severe                                    | 3.16*** | [2.99,3.33] | 2.13*** | [2.02,2.25] |
| DK                                        | 1.28    | [0.99,1.67] | 1.22    | [0.92,1.61] |
| Satisfaction with health care (Very)      |         |             |         |             |
| Somewhat satisfied                        | 1.31*** | [1.26,1.37] | 1.15*** | [1.11,1.20] |
| Very/somewhat dissatisfied                | 1.54*** | [1.45,1.63] | 1.37*** | [1.30,1.45] |
| Had no care in prior 12 mos               | 0.81*** | [0.75,0.88] | 0.77*** | [0.71,0.83] |
| DK                                        | 0.96    | [0.62,1.49] | 1.35    | [0.81,2.23] |
| Where usually gets care (Doctor's office) |         |             |         |             |
| Clinic/health center                      | 0.98    | [0.94,1.02] | 1.02    | [0.98,1.06] |
| Hospital                                  | 1.01    | [0.92,1.12] | 1.06    | [0.96,1.16] |
| Other/has no usual place                  | 0.92**  | [0.86,0.97] | 0.96    | [0.90,1.02] |
| DK                                        | 1.11    | [0.51,2.44] | 1.29    | [0.68,2.45] |

\*p<.05 \*\*p<.01 \*\*\*p<.001

NHIS 2013-2018, US adults age 18-64. N=134,266 for pain in 3+ sites and N=95,675 for chronic pain, respectively. These models are identical to those shown in Table 3 in the manuscript, which only displays the prevalence ratios for sexual-identity groups.

Complex-survey-adjusted (modified/robust) Poisson models of two pain outcomes.

Supplemental Table S2. Odds ratios for sexual minority groups relative to straight, and percent of the pain disparities estimated in Model 1 that are mediated by covariates in Models 2-7.

|                                  | Model 1 | Model 2 | Model 3 | Model 4 | Model 5 | Model 6 | Model 7 |
|----------------------------------|---------|---------|---------|---------|---------|---------|---------|
| <b>PANEL A. Pain in 3+ sites</b> |         |         |         |         |         |         |         |
| Sexual identity (straight=ref)   |         |         |         |         |         |         |         |
| Gay/lesbian                      | 1.58*** | 1.42*** | 1.62*** | 1.47*** | 1.35*** | 1.58*** | 1.33*** |
| Bisexual                         | 2.37*** | 2.10*** | 2.17*** | 1.96*** | 1.49*** | 2.21*** | 1.30**  |
| "Something else"                 | 2.81*** | 2.52*** | 2.44*** | 2.44*** | 1.57**  | 2.71*** | 1.58**  |
| % mediated (vs Model 1)          |         |         |         |         |         |         |         |
| Gay/lesbian                      |         | 26.6    | -1.7    | 18.3    | 36.3    | 2.8     | 44.2    |
| Bisexual                         |         | 14.8    | 11.6    | 25.0    | 53.7    | 8.7     | 70.6    |
| "Something else"                 |         | 10.8    | 14.9    | 18.8    | 57.5    | 5.2     | 60.1    |
| <b>PANEL B. Chronic pain</b>     |         |         |         |         |         |         |         |
| Sexual identity (straight=ref)   |         |         |         |         |         |         |         |
| Gay/lesbian                      | 1.44*** | 1.33*** | 1.53*** | 1.36*** | 1.22*   | 1.44*** | 1.28**  |
| Bisexual                         | 2.24*** | 2.00*** | 2.13*** | 1.83*** | 1.47*** | 2.10*** | 1.30*   |
| "Something else"                 | 2.35*** | 2.14*** | 2.03*** | 2.00*** | 1.46*   | 2.27*** | 1.43*   |
| % mediated (vs Model 1)          |         |         |         |         |         |         |         |
| Gay/lesbian                      |         | 29.2    | -8.9    | 22.4    | 46.4    | 4.4     | 44.7    |
| Bisexual                         |         | 16.3    | 9.1     | 29.5    | 52.2    | 8.6     | 70.3    |
| "Something else"                 |         | 12.1    | 17.7    | 24.7    | 57.2    | 5.4     | 62.7    |

\*p<.05 \*\*p<.01 \*\*\*p<.001

NHIS 2013-2018, US adults age 18-64. N=134,266 for pain in 3+ sites and N=95,675 for chronic pain, respectively. Weighted logistic models of pain in 3+ sites, for 3 different definitions of the analytic sample. For parsimony, only odds ratios for sexual-identity categories shown.

The lines for % mediated show the percent of each sexual minority category's pain difference (vis-à-vis straight adults) that is explained by the respective model's control variables (obtained by comparing the disparities between Model 1 and each respective model). We used the KHB decomposition method appropriate for comparing coefficients from nested nonlinear models (Breen, Karlson and Holm 2013, Karlson, Holm and Breen 2012).

Model 1 controls for age (squared, in decades, centered about 45), sex, and year of interview centered about 2015

Model 2 includes controls like Model 1 and adds race, immigrant status, language of interview, marital, and parental status.

Model 3 includes controls like Model 1 and adds education, family income, home ownership, and employment status

Model 4 includes controls like Model 1 and adds smoking, alcohol, BMI, physical activity, and sleep

Model 5 includes controls like Model 1 and adds psychological distress

Model 6 includes controls like Model 1 and adds satisfaction with health care and usual place of care

Model 7 includes all covariates.

Supplemental Table S3. Prevalence ratios for sexual minority groups for 14 pain operationalizations.

|                                     | Gay/lesbian | Bisexual | "Something else" | N       |
|-------------------------------------|-------------|----------|------------------|---------|
| Site-specific pain (NHIS 2013-2018) |             |          |                  |         |
| 1. Number of pain sites             | 1.24***     | 1.68***  | 1.71***          | 134,266 |
| 2. Pain in at least one site        | 1.15***     | 1.44***  | 1.39***          | 134,266 |
| 3. Facial/jaw pain                  | 1.80***     | 2.14***  | 3.11***          | 134,348 |
| 4. Migraine/headache                | 1.25***     | 1.70***  | 1.67***          | 134,348 |
| 5. Joint pain                       | 1.15***     | 1.67***  | 1.70***          | 134,309 |
| 6. Low back pain                    | 1.19***     | 1.50***  | 1.43***          | 134,343 |
| 7. Neck pain                        | 1.31***     | 1.72***  | 1.76***          | 134,347 |
| General pain (NHIS 2013-15, 2018)   |             |          |                  |         |
| 8. Chronic pain (3 months)          | 1.41***     | 1.92***  | 1.97***          | 54,421  |
| 9. Severe pain                      | 1.74***     | 2.28***  | 2.24***          | 53,537  |
| General pain (NHIS 2016, 2017)      |             |          |                  |         |
| 10. Chronic pain (6 months)         | 1.17        | 1.83***  | 1.80***          | 41,254  |
| 11. High-impact pain                | 1.33        | 2.18***  | 2.34***          | 41,269  |
| General pain (NHIS 2019-2020)       |             |          |                  |         |
| 12. Chronic pain (3 months)         | 1.13        | 2.21***  | 1.98***          | 43,321  |
| 13. Severe pain                     | 0.93        | 2.09***  | 2.34***          | 43,294  |
| 14. High-impact pain                | 1.05        | 2.23***  | 2.43***          | 40,979  |

\*\*\*p<.001

NHIS select years (see within Table). US adults age 18-64. Sample sizes for each model are shown in the last column.

Prevalence ratios from complex-survey-design-adjusted modified (robust) Poisson models for 14 different pain definitions for adults 18-64 as a function of sexual identity with straight as omitted reference, controlling for age, age squared, year, and sex.

Each row is a separate model. Each model only shows the prevalence ratios for sexual minority categories; prevalence ratios for covariates are omitted for parsimony.

- Site-specific pain measures were ascertained as
  - "During the past 3 months, did you have [low back, neck, facial/jaw, headache/migraine, joint] pain?"
  - Number of pain sites adds up all the sites respondents noted while pain in at least one site is a dichotomous measure coded yes if respondents experienced pain in any of the five sites and zero otherwise.
- General pain measures were ascertained and coded as follows.
  - Chronic pain captures the frequency of pain over the past 3 or 6 months, respectively: never or some days are coded as 0 while most days or every day are coded as 1.
  - Severe pain combined the frequency question with the level of pain last time the respondent had pain: "a lot of pain" is coded as 1, while a little or "somewhere in between" are coded as 0.
  - High-impact pain captures "How often did pain limit life or work activities." Never or some days is coded 0; most days or every day is coded 1.

## REFERENCES

- Breen, Richard, Kristian Bernt Karlson and Anders Holm. 2013. "Total, Direct, and Indirect Effects in Logit and Probit Models." *Sociological Methods & Research* 42(2):164-91. doi: 10.1177/0049124113494572.
- Karlson, Kristian Bernt, Anders Holm and Richard Breen. 2012. "Comparing Regression Coefficients between Same-Sample Nested Models Using Logit and Probit: A New Method." *Sociological Methodology* 42:286-313.
